# Supplementary material for: Effectiveness of Different Sample Treatments for the Elemental Characterization of Bees and Beehive Products
Source: PubMed Central journal article supplement (PMC7570605; doi:10.3390/molecules25184263), 2020-09-17
Supplement: molecules-25-04263-s001.pdf [file molecules-25-04263-s001.pdf]

# Supplementary Materials

## Effectiveness of different sample treatments for the elemental characterization of bees and beehive products

**Maria Luisa Astolfi <sup>1,\*</sup>, Marcelo Enrique Conti <sup>2</sup>, Elisabetta Marconi <sup>3</sup>, Lorenzo Massimi <sup>1</sup> and Silvia Canepari <sup>1</sup>**

<sup>1</sup>Department of Chemistry, Sapienza University, Piazzale Aldo Moro 5, I-00185 Rome, Italy;  
marialuisa.astolfi@uniroma1.it

<sup>2</sup>Department of Management, Sapienza University, Via del Castro Laurenziano 9, I-00161 Rome, Italy

<sup>3</sup>Department of Public Health and Infectious Diseases, Sapienza University, Piazzale Aldo Moro 5, I-00185 Rome, Italy

\* Correspondence: marialuisa.astolfi@uniroma1.it

**Table S1.** Element concentrations (mg kg<sup>-1</sup>) in working bee samples applying four digestion methods prior to analysis by ICP-MS and ICP-OES.

| Element              | N <sup>a</sup> | Measured concentration <sup>b</sup> |              |                           |              |                            |              |                          |              |
|----------------------|----------------|-------------------------------------|--------------|---------------------------|--------------|----------------------------|--------------|--------------------------|--------------|
|                      |                | Method A                            |              | Method B                  |              | Method B1                  |              | Method B2                |              |
|                      |                | M                                   | SD           | M                         | SD           | M                          | SD           | M                        | SD           |
| <b>Al</b>            | 18             | <b>17.7<sup>c</sup></b>             | <b>4.0</b>   | <b>17.4<sup>d</sup></b>   | <b>3.5</b>   | <b>50.4<sup>c,d</sup></b>  | <b>5.2</b>   | 37                       | 12           |
| <b>As</b>            | 13             | 0.0182                              | 0.0096       | 0.025                     | 0.015        | <2                         | -            | <2                       | -            |
| <b>B</b>             | 18             | <b>13.7<sup>c</sup></b>             | <b>3.9</b>   | <b>12.3<sup>d</sup></b>   | <b>4.0</b>   | <b>52.8<sup>c,d</sup></b>  | <b>2.1</b>   | 31.3                     | 5.2          |
| <b>Ba</b>            | 18             | 2.45                                | 0.48         | <b>1.36<sup>c,d</sup></b> | <b>0.63</b>  | <b>3.9<sup>c</sup></b>     | <b>1.1</b>   | <b>3.71<sup>d</sup></b>  | <b>0.38</b>  |
| <b>Be</b>            | 13             | 0.00397                             | 0.00066      | 0.0029                    | 0.0013       | <0.02                      | -            | <0.02                    | -            |
| <b>Bi</b>            | 13             | 0.0048                              | 0.0025       | 0.00301                   | 0.00084      | <0.4                       | -            | <0.1                     | -            |
| <b>Ca</b>            | 18             | <b>818<sup>c</sup></b>              | <b>190</b>   | 737                       | 130          | 578                        | 33           | <b>395<sup>c</sup></b>   | <b>40</b>    |
| <b>Cd</b>            | 12             | 0.0070                              | 0.0027       | 0.0055                    | 0.0011       | <0.06                      | -            | <0.02                    | -            |
| <b>Ce</b>            | 12             | 0.094                               | 0.023        | 0.078                     | 0.032        | <0.1                       | -            | <0.4                     | -            |
| <b>Co</b>            | 14             | 0.046                               | 0.015        | 0.036                     | 0.010        | <0.09                      | -            | <0.1                     | -            |
| <b>Cr</b>            | 18             | <b>0.047<sup>c</sup></b>            | <b>0.009</b> | <b>0.043<sup>d</sup></b>  | <b>0.010</b> | <b>0.121<sup>c,d</sup></b> | <b>0.008</b> | <0.1                     | -            |
| <b>Cs</b>            | 12             | 0.0271                              | 0.0060       | 0.022                     | 0.010        | -                          | -            | -                        | -            |
| <b>Cu</b>            | 18             | 7.83                                | 0.94         | 6.98                      | 0.74         | 7.5                        | 1.2          | 8.13                     | 0.69         |
| <b>Fe</b>            | 18             | 49.5                                | 5.9          | 49.4                      | 13.0         | 58.4                       | 9.7          | 50.4                     | 7.2          |
| <b>Ga</b>            | 12             | <b>0.070<sup>c</sup></b>            | <b>0.013</b> | <b>0.042<sup>c</sup></b>  | <b>0.024</b> | <1                         | -            | <0.4                     | -            |
| <b>K</b>             | 18             | <b>5109<sup>c</sup></b>             | <b>435</b>   | 4801                      | 719          | 4186                       | 347          | <b>3287<sup>c</sup></b>  | <b>302</b>   |
| <b>La</b>            | 13             | 0.048                               | 0.012        | 0.039                     | 0.015        | <0.07                      | -            | <0.05                    | -            |
| <b>Li</b>            | 12             | 0.0179                              | 0.0035       | 0.0185                    | 0.0084       | <0.1                       | -            | <0.1                     | -            |
| <b>Mg</b>            | 18             | <b>411<sup>c</sup></b>              | <b>50</b>    | 388                       | 87           | 400                        | 27           | <b>298<sup>c</sup></b>   | <b>6</b>     |
| <b>Mn</b>            | 18             | 13.5                                | 6.1          | 8.6                       | 1.9          | 10.5                       | 4.3          | 16.0                     | 3.1          |
| <b>Mo</b>            | 18             | <b>0.176<sup>c</sup></b>            | <b>0.015</b> | 0.152                     | 0.039        | 0.112                      | 0.011        | <b>0.109<sup>c</sup></b> | <b>0.011</b> |
| <b>Na</b>            | 18             | 274                                 | 26           | 264                       | 24           | 280                        | 15           | 267                      | 14           |
| <b>Nb</b>            | 12             | 0.0087                              | 0.0025       | 0.0063                    | 0.0026       | <0.1                       | -            | <0.3                     | -            |
| <b>Ni</b>            | 12             | 0.057                               | 0.020        | 0.064                     | 0.021        | <0.4                       | -            | <0.6                     | -            |
| <b>P</b>             | 18             | 1980                                | 726          | <b>1484<sup>c</sup></b>   | <b>186</b>   | <b>3322<sup>c</sup></b>    | <b>294</b>   | 2890                     | 76           |
| <b>Pb</b>            | 15             | 0.141                               | 0.043        | 0.105                     | 0.035        | <0.2                       | -            | <0.2                     | -            |
| <b>Rb</b>            | 15             | 13.0                                | 1.4          | 12.2                      | 3.5          | 0.69                       | 0.25         | <2                       | -            |
| <b>S<sup>e</sup></b> | 10             | <b>462<sup>c</sup></b>              | <b>40</b>    | 713                       | 105          | 1805                       | 168          | <b>2334<sup>c</sup></b>  | <b>164</b>   |
| <b>Sb</b>            | 12             | 0.0215                              | 0.0035       | 0.028                     | 0.030        | <0.7                       | -            | <0.5                     | -            |
| <b>Se</b>            | 7              | <0.02                               | 0.0065       | 0.0082                    | 0.0046       | <4                         | -            | <4                       | -            |
| <b>Si</b>            | 18             | 62                                  | 11           | 83                        | 27           | 78                         | 16           | 70                       | 45           |
| <b>Sn</b>            | 13             | 0.085                               | 0.035        | 0.135                     | 0.052        | <0.1                       | -            | <0.1                     | -            |
| <b>Sr</b>            | 18             | 3.3                                 | 1.4          | 2.4                       | 1.1          | 2.47                       | 0.39         | 2.33                     | 0.04         |
| <b>Te</b>            | 7              | 0.00058                             | 0.00056      | 0.00078                   | 0.00077      | <1                         | -            | <0.6                     | -            |
| <b>Ti</b>            | 18             | 0.88                                | 0.22         | 1.09                      | 0.74         | 2.39                       | 0.39         | 2.45                     | 0.58         |
| <b>Tl</b>            | 12             | 0.068                               | 0.032        | 0.072                     | 0.045        | <4                         | -            | <3                       | -            |
| <b>U</b>             | 12             | 0.00366                             | 0.00069      | 0.0034                    | 0.0014       | <3                         | -            | <3                       | -            |
| <b>V</b>             | 16             | 0.053                               | 0.014        | 0.047                     | 0.015        | 0.146                      | 0.028        | <1                       | -            |
| <b>W</b>             | 12             | 0.037                               | 0.018        | 0.037                     | 0.020        | <1                         | -            | <1                       | -            |
| <b>Zn</b>            | 18             | 33.6                                | 22.0         | 27.9                      | 3.5          | 35                         | 13           | 38.5                     | 7.3          |
| <b>Zr</b>            | 13             | 0.052                               | 0.015        | 0.049                     | 0.014        | <0.3                       | -            | <0.1                     | -            |

<sup>a</sup> N, number of valid data. <sup>b</sup> M, mean; SD, standard deviation. Digests obtained by methods A or B were analyzed with ICP-MS, and digests obtained by methods B1 or B2 were analysed with ICP-OES. <sup>c,d</sup> Results marked in bold were considered statistically significant for p-values <0.05. Same superscript letters within rows are significantly different. <sup>e</sup> S was determined with ICP-OES.

**Table S2.** Element concentrations (mg kg<sup>-1</sup>) in working beeswax samples applying four digestion methods prior to analysis by ICP-MS and ICP-OES.

| Element        | N <sup>a</sup> | Measured concentration <sup>b</sup> |              |          |         |                         |             |           |       |
|----------------|----------------|-------------------------------------|--------------|----------|---------|-------------------------|-------------|-----------|-------|
|                |                | Method A                            |              | Method B |         | Method B1               |             | Method B2 |       |
|                |                | M                                   | SD           | M        | SD      | M                       | SD          | M         | SD    |
| Al             | 16             | 0.75                                | 0.34         | 1.8      | 1.5     | 1.65                    | 0.56        | 0.76      | 0.46  |
| As             | 11             | 0.0041                              | 0.0036       | 0.0047   | 0.0035  | <2                      | -           | <2        | -     |
| B              | 3              | 0.22                                | 0.31         | 0.28     | 0.34    | <13                     | -           | <8        | -     |
| Ba             | 10             | <0.4                                |              | <0.2     |         | 1.12                    | 0.39        | 1.22      | 0.97  |
| Be             | 10             | 0.00053                             | 0.00046      | 0.00036  | 0.00016 | <0.02                   | -           | <0.02     | -     |
| Bi             | 10             | <0.4                                |              | <0.1     |         | <0.4                    | -           | <0.1      | -     |
| Ca             | 13             | 155                                 | 36           | 196      | 56      | 161                     | 26          | <80       | -     |
| Cd             | 11             | 0.0031                              | 0.0019       | 0.00215  | 0.00047 | <0.06                   | -           | <0.02     | -     |
| Ce             | 11             | 0.0085                              | 0.0014       | 0.0099   | 0.0017  | <0.1                    | -           | <0.4      | -     |
| Co             | 10             | 0.0025                              | 0.0018       | 0.0043   | 0.0032  | <0.09                   | -           | <0.1      | -     |
| Cr             | 17             | 0.41                                | 0.51         | 0.62     | 0.26    | 0.37                    | 0.19        | 1.26      | 0.77  |
| Cs             | 11             | 0.00073                             | 0.00044      | 0.00082  | 0.00069 | -                       | -           | -         | -     |
| Cu             | 11             | 0.204                               | 0.046        | 0.159    | 0.060   | <0.4                    | -           | <0.3      | -     |
| Fe             | 17             | 3.7                                 | 3.0          | 8.8      | 4.4     | 4.2                     | 1.8         | 5.1       | 3.8   |
| Ga             | 7              | 0.0145                              | 0.0156       | 0.0043   | 0.0086  | <1                      | -           | <0.4      | -     |
| K              | 10             | 15.1                                | 6.6          | 21       | 24      | <140                    | -           | <100      | -     |
| La             | 11             | 0.0042                              | 0.0006       | 0.0050   | 0.0021  | <0.07                   | -           | <0.05     | -     |
| Li             | 11             | 0.0036                              | 0.0016       | 0.0051   | 0.0039  | <0.1                    | -           | <0.1      | -     |
| Mg             | 16             | 3.8                                 | 1.5          | 4.9      | 2.1     | 4.24                    | 0.35        | <2        | -     |
| Mn             | 17             | 0.277                               | 0.090        | 0.31     | 0.14    | 0.277                   | 0.025       | 0.21      | 0.15  |
| Mo             | 11             | 0.0034                              | 0.0028       | 0.0037   | 0.0013  | <0.09                   | -           | <0.1      | -     |
| Na             | 11             | 10.2                                | 5.7          | 12.5     | 4.4     | <10                     | -           | <12       | -     |
| Nb             | 9              | 0.00029                             | 0.00036      | 0.00016  | 0.00020 | <0.1                    | -           | <0.3      | -     |
| Ni             | 11             | 0.028                               | 0.028        | 0.087    | 0.048   | <0.4                    | -           | <0.6      | -     |
| P              | 13             | 10.6                                | 6.8          | 10.9     | 7.4     | <20                     | -           | <20       | -     |
| Pb             | 13             | 0.214                               | 0.039        | 0.208    | 0.027   | <0.2                    | -           | <0.2      | -     |
| Rb             | 13             | 0.028                               | 0.021        | 0.0195   | 0.0087  | 0.73                    | 0.38        | <2        | -     |
| S <sup>e</sup> | 5              | <20                                 |              | <20      |         | 90                      | 45          | 35        | 21    |
| Sb             | 11             | 0.0050                              | 0.0025       | 0.00339  | 0.00048 | <0.7                    | -           | <0.5      | -     |
| Se             | 1              | <0.02                               |              | <0.007   |         | <4                      | -           | <4        | -     |
| Si             | 2              | <9                                  |              | <8       |         | <15                     | -           | <15       | -     |
| Sn             | 14             | 0.021                               | 0.014        | 0.0198   | 0.0060  | 0.28                    | 0.20        | 0.11      | 0.11  |
| Sr             | 14             | 0.40                                | 0.14         | 0.36     | 0.18    | 0.171                   | 0.011       | <0.3      | -     |
| Te             | 5              | 0.0009                              | 0.0011       | <0.003   |         | <1                      | -           | <0.6      | -     |
| Ti             | 16             | <b>0.030<sup>c</sup></b>            | <b>0.016</b> | 0.075    | 0.047   | <b>0.22<sup>c</sup></b> | <b>0.13</b> | 0.112     | 0.058 |
| Tl             | 11             | 0.00052                             | 0.00022      | 0.00078  | 0.00029 | <4                      | -           | <3        | -     |
| U              | 11             | 0.00134                             | 0.00039      | 0.00144  | 0.00021 | <3                      | -           | <3        | -     |
| V              | 4              | 0.0013                              | 0.0020       | 0.0015   | 0.0025  | <0.1                    | -           | <0.1      | -     |
| W              | 1              | <0.0003                             |              | <0.0002  |         | <1                      | -           | <1        | -     |
| Zn             | 14             | 3.2                                 | 1.4          | 3.8      | 1.1     | 4.34                    | 0.78        | <3        | -     |
| Zr             | 11             | 0.0040                              | 0.0032       | 0.0063   | 0.0040  | <0.3                    | -           | <0.1      | -     |

<sup>a</sup> N, number of valid data. <sup>b</sup> M, mean; SD, standard deviation. Digests obtained by methods A or B were analyzed with ICP-MS, and digests obtained by methods B1 or B2 were analysed with ICP-OES. <sup>c,d</sup> Results marked in bold were considered statistically significant for p-values <0.05. Same superscript letters within rows are significantly different. <sup>e</sup> S was determined with ICP-OES.

**Table S3.** Element concentrations (mg kg<sup>-1</sup>) in working honey samples applying four digestion methods prior to analysis by ICP-MS and ICP-OES.

| Element        | N <sup>a</sup> | Measured concentration <sup>b</sup> |                 |                             |                         |                         |            |                         |             |
|----------------|----------------|-------------------------------------|-----------------|-----------------------------|-------------------------|-------------------------|------------|-------------------------|-------------|
|                |                | Method A                            |                 | Method B                    |                         | Method B1               |            | Method B2               |             |
|                |                | M                                   | SD              | M                           | SD                      | M                       | SD         | M                       | SD          |
| Al             | 14             | <b>0.48<sup>c</sup></b>             | <b>0.13</b>     | 0.61                        | 0.14                    | 0.701                   | 0.070      | <b>2.90<sup>c</sup></b> | <b>0.27</b> |
| As             | 8              | 0.0037                              | 0.0018          | 0.0057                      | 0.0038                  | <2                      | -          | <2                      | -           |
| B              | 14             | 4.67                                | 0.56            | 5.0                         | 1.0                     | 16.8                    | 3.1        | 15.4                    | 0.3         |
| Ba             | 12             | 0.63                                | 0.34            | <b>0.45</b>                 | <b>0.39<sup>c</sup></b> | 1.28                    | 0.22       | <b>1.66<sup>c</sup></b> | <b>0.11</b> |
| Be             | 0              | <0.00002                            |                 | <0.00002                    |                         | <0.02                   | -          | <0.02                   | -           |
| Bi             | 3              | <0.00004                            |                 | <0.00006                    |                         | <0.4                    | -          | <0.1                    | -           |
| Ca             | 8              | 85                                  | 17              | 84                          | 17                      | <140                    | -          | <80                     | -           |
| Cd             | 3              | 0.00031                             | 0.00050         | 0.00012                     | 0.00010                 | <0.06                   | -          | <0.02                   | -           |
| Ce             | 8              | 0.00124                             | 0.00015         | 0.00136                     | 0.00024                 | <0.1                    | -          | <0.4                    | -           |
| Co             | 8              | 0.00142                             | 0.00039         | 0.00192                     | 0.00035                 | <0.09                   | -          | <0.1                    | -           |
| Cr             | 8              | 0.14                                | 0.16            | 0.22                        | 0.33                    | <0.1                    | -          | <0.1                    | -           |
| Cs             | 8              | 0.0188                              | 0.0033          | 0.0187                      | 0.0031                  | -                       | -          | -                       | -           |
| Cu             | 9              | 0.157                               | 0.008           | 0.144                       | 0.033                   | <0.4                    | -          | <0.3                    | -           |
| Fe             | 14             | 1.45                                | 0.87            | 1.44                        | 0.91                    | 0.863                   | 0.084      | 1.46                    | 0.36        |
| Ga             | 8              | 0.025                               | 0.012           | 0.0220                      | 0.0075                  | <1                      | -          | <0.4                    | -           |
| K              | 14             | 752                                 | 99              | 741                         | 80                      | 462                     | 51         | 497                     | 13          |
| La             | 8              | <b>0.000615<sup>c</sup></b>         | <b>0.000028</b> | <b>0.000532<sup>c</sup></b> | <b>0.000036</b>         | <0.07                   | -          | <0.05                   | -           |
| Li             | 8              | 0.0020                              | 0.0015          | 0.0041                      | 0.0016                  | <0.1                    | -          | <0.1                    | -           |
| Mg             | 14             | 21.8                                | 2.2             | <b>23.5<sup>c</sup></b>     | <b>4.1</b>              | <b>12.6<sup>c</sup></b> | <b>0.5</b> | 14.9                    | 0.8         |
| Mn             | 14             | 0.248                               | 0.030           | 0.243                       | 0.019                   | 0.20                    | 0.012      | 0.231                   | 0.002       |
| Mo             | 8              | <b>0.00416<sup>c</sup></b>          | <b>0.00086</b>  | <b>0.00258<sup>c</sup></b>  | <b>0.00011</b>          | <0.09                   | -          | <0.1                    | -           |
| Na             | 14             | 28.0                                | 1.6             | 30.5                        | 7.9                     | 32.5                    | 1.4        | 35.9                    | 1.9         |
| Nb             | 6              | 0.00051                             | 0.00044         | 0.000029                    | 0.000050                | <0.1                    | -          | <0.3                    | -           |
| Ni             | 0              | <0.002                              |                 | <0.003                      |                         | <0.4                    | -          | <0.6                    | -           |
| P              | 14             | 58                                  | 19              | 51                          | 12                      | 52                      | 5.0        | 58.5                    | 1.9         |
| Pb             | 0              | <0.001                              |                 | <0.001                      | 0.037                   | <0.2                    | -          | <0.2                    | -           |
| Rb             | 9              | 4.87                                | 0.64            | 5.02                        | 0.82                    | <0.6                    | -          | <2                      | -           |
| S <sup>e</sup> | 5              | <20                                 |                 | 23.9                        | 0.4                     | <52                     | -          | 48.6                    | 1.3         |
| Sb             | 7              | 0.0037                              | 0.0030          | 0.0035                      | 0.0032                  | <0.7                    | -          | <0.5                    | -           |
| Se             | 0              | <0.02                               |                 | <0.007                      |                         | <4                      | -          | <4                      | -           |
| Si             | 8              | 57.0                                | 6.6             | 44.8                        | 6.8                     | <15                     | -          | <15                     | -           |
| Sn             | 10             | 0.00362                             | 0.00056         | 0.00301                     | 0.00091                 | <0.1                    | -          | <0.1                    | -           |
| Sr             | 14             | 0.93                                | 0.33            | 0.76                        | 0.28                    | 0.580                   | 0.056      | 0.633                   | 0.033       |
| Te             | 4              | 0.00052                             | 0.00039         | <0.0003                     |                         | <1                      | -          | <0.6                    | -           |
| Ti             | 10             | <b>0.0110<sup>c</sup></b>           | <b>0.0008</b>   | <b>0.0138<sup>c</sup></b>   | <b>0.0008</b>           | <0.05                   | -          | <0.1                    | -           |
| Tl             | 8              | 0.0101                              | 0.0017          | 0.0113                      | 0.0030                  | <4                      | -          | <3                      | -           |
| U              | 7              | 0.000048                            | 0.000014        | 0.000048                    | 0.000057                | <3                      | -          | <3                      | -           |
| V              | 6              | 0.0037                              | 0.0038          | 0.0012                      | 0.0010                  | <0.1                    | -          | <0.1                    | -           |
| W              | 5              | 0.00086                             | 0.00074         | 0.00038                     | 0.00024                 | <1                      | -          | <1                      | -           |
| Zn             | 8              | 0.98                                | 0.24            | 0.97                        | 0.18                    | <3                      | -          | <3                      | -           |
| Zr             | 8              | 0.00273                             | 0.00059         | 0.00178                     | 0.00029                 | <0.3                    | -          | <0.1                    | -           |

<sup>a</sup> N, number of valid data. <sup>b</sup> M, mean; SD, standard deviation. Digests obtained by methods A or B were analyzed with ICP-MS, and digests obtained by methods B1 or B2 were analysed with ICP-OES. <sup>c,d</sup> Results marked in bold were considered statistically significant for p-values <0.05. Same superscript letters within rows are significantly different. <sup>e</sup> S was determined with ICP-OES.

**Table S4.** Element concentrations (mg kg<sup>-1</sup>) in working bee pollen samples applying four digestion methods prior to analysis by ICP-MS and ICP-OES.

| Element        | N <sup>a</sup> | Measured concentration <sup>b</sup> |                |                            |                |                           |              |                          |              |
|----------------|----------------|-------------------------------------|----------------|----------------------------|----------------|---------------------------|--------------|--------------------------|--------------|
|                |                | Method A                            |                | Method B                   |                | Method B1                 |              | Method B2                |              |
|                |                | M                                   | SD             | M                          | SD             | M                         | SD           | M                        | SD           |
| Al             | 18             | <b>3.3<sup>c,d</sup></b>            | <b>1.5</b>     | 18.2                       | 2.1            | <b>24.0<sup>c</sup></b>   | <b>3.4</b>   | <b>47<sup>d</sup></b>    | <b>12</b>    |
| As             | 12             | 0.0140                              | 0.0070         | 0.0258                     | 0.0087         | <2                        | -            | <2                       | -            |
| B              | 18             | <b>9.2<sup>c</sup></b>              | <b>3.0</b>     | <b>9.6<sup>d</sup></b>     | <b>2.7</b>     | <b>30.5<sup>c</sup></b>   | <b>3.1</b>   | <b>42.4<sup>d</sup></b>  | <b>9.2</b>   |
| Ba             | 18             | <b>2.05<sup>c</sup></b>             | <b>0.57</b>    | 2.09                       | 0.35           | 3.68                      | 0.31         | <b>4.23<sup>c</sup></b>  | <b>0.59</b>  |
| Be             | 12             | <b>0.00059<sup>c</sup></b>          | <b>0.00030</b> | <b>0.00114<sup>c</sup></b> | <b>0.00029</b> | <0.02                     | -            | <0.02                    | -            |
| Bi             | 9              | 0.00045                             | 0.00065        | 0.00055                    | 0.00084        | <0.4                      | -            | <0.1                     | -            |
| Ca             | 18             | 726                                 | 202            | 863                        | 256            | 715                       | 66           | 778                      | 49           |
| Cd             | 18             | 0.048                               | 0.014          | 0.061                      | 0.015          | 0.073                     | 0.011        | 0.075                    | 0.013        |
| Ce             | 12             | <b>0.0106<sup>c</sup></b>           | <b>0.0037</b>  | <b>0.0395<sup>c</sup></b>  | <b>0.0057</b>  | <0.1                      | -            | <0.4                     | -            |
| Co             | 18             | 0.151                               | 0.020          | 0.161                      | 0.015          | 0.191                     | 0.031        | 0.193                    | 0.026        |
| Cr             | 18             | <b>0.0173<sup>c,d</sup></b>         | <b>0.0063</b>  | 0.040                      | 0.032          | <b>0.112<sup>c</sup></b>  | <b>0.037</b> | <b>0.113<sup>d</sup></b> | <b>0.024</b> |
| Cs             | 12             | 0.041                               | 0.027          | 0.038                      | 0.010          | -                         | -            | -                        | -            |
| Cu             | 18             | <b>5.7<sup>c</sup></b>              | <b>1.4</b>     | 7.3                        | 1.8            | 7.44                      | 0.24         | <b>7.96<sup>c</sup></b>  | <b>0.21</b>  |
| Fe             | 18             | <b>29.6<sup>c</sup></b>             | <b>4.4</b>     | 37.3                       | 2.2            | 36.8                      | 4.6          | <b>41.5<sup>c</sup></b>  | <b>7.1</b>   |
| Ga             | 12             | 0.050                               | 0.031          | 0.051                      | 0.026          | <1                        | -            | <0.4                     | -            |
| K              | 18             | 4755                                | 973            | 5199                       | 678            | 4470                      | 281          | 4641                     | 97           |
| La             | 13             | <b>0.0048<sup>c</sup></b>           | <b>0.0016</b>  | <b>0.0186<sup>c</sup></b>  | <b>0.0029</b>  | 0.079                     | 0.085        | <0.05                    | -            |
| Li             | 12             | <b>0.0164<sup>c</sup></b>           | <b>0.0031</b>  | <b>0.0302<sup>c</sup></b>  | <b>0.0083</b>  | <0.1                      | -            | <0.1                     | -            |
| Mg             | 18             | 392                                 | 109            | 469                        | 33             | 447                       | 12           | 478                      | 21           |
| Mn             | 18             | 32                                  | 11             | 27.5                       | 9.1            | 35.8                      | 5.2          | 33.0                     | 4.6          |
| Mo             | 13             | 0.0200                              | 0.0071         | 0.0197                     | 0.0083         | <0.09                     | -            | <0.1                     | -            |
| Na             | 18             | <b>28.4<sup>c</sup></b>             | <b>8.7</b>     | 40.8                       | 11.0           | 62.2                      | 2.3          | <b>69.3<sup>c</sup></b>  | <b>0.1</b>   |
| Nb             | 12             | 0.00116                             | 0.00062        | 0.00114                    | 0.00042        | <0.1                      | -            | <0.3                     | -            |
| Ni             | 18             | 1.43                                | 0.44           | 1.69                       | 0.36           | 1.66                      | 0.11         | 1.64                     | 0.19         |
| P              | 18             | 1751                                | 625            | 1554                       | 41             | 3688                      | 320          | 3917                     | 75           |
| Pb             | 12             | 0.028                               | 0.035          | 0.026                      | 0.012          | <0.2                      | -            | <0.2                     | -            |
| Rb             | 10             | 7.2                                 | 3.8            | 5.4                        | 1.0            | <0.6                      | -            | <2                       | -            |
| S <sup>e</sup> | 10             | 735                                 | 67             | <b>714<sup>c</sup></b>     | <b>82</b>      | 1718                      | 132          | <b>2544<sup>c</sup></b>  | <b>139</b>   |
| Sb             | 12             | 0.0039                              | 0.0033         | 0.0044                     | 0.0030         | <0.7                      | -            | <0.5                     | -            |
| Se             | 9              | 0.0230                              | 0.0147         | 0.0145                     | 0.0070         | <4                        | -            | <4                       | -            |
| Si             | 15             | 44                                  | 21             | 51                         | 25             | <b>&lt;15<sup>c</sup></b> | -            | <b>139<sup>c</sup></b>   | <b>36</b>    |
| Sn             | 12             | 0.0039                              | 0.0019         | 0.0091                     | 0.0053         | <0.1                      | -            | 0.15                     | 0.11         |
| Sr             | 18             | 1.83                                | 0.50           | 2.35                       | 0.79           | 1.70                      | 0.43         | 1.96                     | 0.27         |
| Te             | 9              | 0.00093                             | 0.00082        | 0.00105                    | 0.00056        | <1                        | -            | <0.6                     | -            |
| Ti             | 18             | <b>0.202<sup>c</sup></b>            | <b>0.030</b>   | 0.46                       | 0.15           | 0.74                      | 0.11         | <b>2.82<sup>c</sup></b>  | <b>0.40</b>  |
| Tl             | 12             | 0.0027                              | 0.0020         | 0.0034                     | 0.0019         | <4                        | -            | <3                       | -            |
| U              | 12             | <b>0.00051<sup>c</sup></b>          | <b>0.00012</b> | <b>0.00125<sup>c</sup></b> | <b>0.00027</b> | <3                        | -            | <3                       | -            |
| V              | 12             | <b>0.0094<sup>c</sup></b>           | <b>0.0052</b>  | <b>0.0332<sup>c</sup></b>  | <b>0.0082</b>  | <0.1                      | -            | <0.1                     | -            |
| W              | 3              | 0.00049                             | 0.00059        | 0.00037                    | 0.00059        | <1                        | -            | <1                       | -            |
| Zn             | 18             | 35                                  | 11             | 28.1                       | 2.0            | 38.2                      | 5.5          | 38.3                     | 0.8          |
| Zr             | 13             | 0.0099                              | 0.0060         | 0.0111                     | 0.0032         | <0.3                      | -            | <0.1                     | -            |

<sup>a</sup> N, number of valid data. <sup>b</sup> M, mean; SD, standard deviation. Digests obtained by methods A or B were analyzed with ICP-MS, and digests obtained by methods B1 or B2 were analysed with ICP-OES. <sup>c,d</sup> Results marked in bold were considered statistically significant for p-values <0.05. Same superscript letters within rows are significantly different. <sup>e</sup> S was determined with ICP-OES.

**Table S5.** Element concentrations (mg kg<sup>-1</sup>) in working propolis samples applying four digestion methods prior to analysis by ICP-MS and ICP-OES.

| Element        | N <sup>a</sup> | Measured concentration <sup>b</sup> |               |                          |              |                            |              |                           |              |
|----------------|----------------|-------------------------------------|---------------|--------------------------|--------------|----------------------------|--------------|---------------------------|--------------|
|                |                | Method A                            |               | Method B                 |              | Method B1                  |              | Method B2                 |              |
|                |                | M                                   | SD            | M                        | SD           | M                          | SD           | M                         | SD           |
| Al             | 19             | <b>152<sup>c,d</sup></b>            | <b>29</b>     | 260                      | 44           | <b>925<sup>c</sup></b>     | <b>86</b>    | <b>1161<sup>d</sup></b>   | <b>52</b>    |
| As             | 13             | 0.69                                | 0.19          | 0.62                     | 0.15         | <2                         | -            | <2                        | -            |
| B              | 19             | 9.4                                 | 1.9           | <b>8.34<sup>c</sup></b>  | <b>0.78</b>  | 28.4                       | 4.2          | <b>40.1<sup>c</sup></b>   | <b>1.6</b>   |
| Ba             | 19             | <b>1.12<sup>c</sup></b>             | <b>0.28</b>   | 2.01                     | 0.56         | 26.7                       | 2.5          | <b>30.0<sup>c</sup></b>   | <b>2.0</b>   |
| Be             | 19             | <b>0.0439<sup>c</sup></b>           | <b>0.0068</b> | 0.053                    | 0.013        | 0.0652                     | 0.0070       | <b>0.082<sup>c</sup></b>  | <b>0.012</b> |
| Bi             | 13             | 0.0149                              | 0.0054        | 0.0192                   | 0.0036       | <0.4                       | -            | <0.1                      | -            |
| Ca             | 19             | <b>1684<sup>c</sup></b>             | <b>433</b>    | <b>1523<sup>d</sup></b>  | <b>477</b>   | 2105                       | 202          | <b>2602<sup>c,d</sup></b> | <b>122</b>   |
| Cd             | 19             | <b>0.066<sup>c</sup></b>            | <b>0.014</b>  | 0.070                    | 0.028        | 0.180                      | 0.039        | <b>0.234<sup>c</sup></b>  | <b>0.020</b> |
| Ce             | 19             | <b>1.18<sup>c</sup></b>             | <b>0.19</b>   | <b>1.15<sup>d</sup></b>  | <b>0.19</b>  | <b>0.303<sup>c,d</sup></b> | <b>0.045</b> | 0.384                     | 0.017        |
| Co             | 19             | <b>0.89<sup>c</sup></b>             | <b>0.14</b>   | 1.08                     | 0.35         | 1.07                       | 0.11         | <b>1.79<sup>c</sup></b>   | <b>0.37</b>  |
| Cr             | 19             | <b>1.78<sup>c</sup></b>             | <b>0.76</b>   | 2.07                     | 0.62         | 4.3                        | 2.0          | <b>4.30<sup>c</sup></b>   | <b>0.51</b>  |
| Cs             | 13             | 0.283                               | 0.047         | 0.290                    | 0.039        | -                          | -            | -                         | -            |
| Cu             | 19             | 10.6                                | 2.7           | 11.8                     | 7.0          | 11.1                       | 1.7          | 18                        | 10           |
| Fe             | 19             | 1315                                | 392           | 1624                     | 545          | 1728                       | 355          | 2158                      | 496          |
| Ga             | 13             | 6.6                                 | 1.5           | 10.7                     | 6.9          | <1                         | -            | <0.4                      | -            |
| K              | 19             | 1682                                | 285           | 1620                     | 192          | 1566                       | 113          | 1927                      | 84           |
| La             | 19             | 0.60                                | 0.11          | 0.581                    | 0.094        | 0.623                      | 0.061        | 0.786                     | 0.070        |
| Li             | 19             | <b>0.264<sup>c,d</sup></b>          | <b>0.056</b>  | 0.482                    | 0.073        | <b>0.610<sup>c</sup></b>   | <b>0.070</b> | <b>0.91<sup>d</sup></b>   | <b>0.15</b>  |
| Mg             | 19             | <b>313<sup>c</sup></b>              | <b>43</b>     | 377                      | 50           | 371                        | 17           | <b>442<sup>c</sup></b>    | <b>13</b>    |
| Mn             | 19             | <b>22.4<sup>c</sup></b>             | <b>4.9</b>    | 23.4                     | 5.2          | 32.4                       | 2.8          | <b>50.2<sup>c</sup></b>   | <b>9.7</b>   |
| Mo             | 19             | 0.43                                | 0.12          | 0.34                     | 0.15         | 0.280                      | 0.080        | 0.365                     | 0.089        |
| Na             | 19             | 273                                 | 49            | 311                      | 99           | 290                        | 17           | 419                       | 12           |
| Nb             | 14             | 0.075                               | 0.016         | 0.087                    | 0.016        | <0.1                       | -            | <0.3                      | -            |
| Ni             | 19             | 1.40                                | 0.33          | 2.07                     | 0.53         | 1.98                       | 0.55         | 2.05                      | 0.22         |
| P              | 19             | 491                                 | 152           | 370                      | 76           | 503                        | 62           | 548                       | 9            |
| Pb             | 19             | 15.3                                | 7.8           | 15.7                     | 5.4          | 20.5                       | 6.9          | 26.2                      | 4.5          |
| Rb             | 13             | 7.9                                 | 1.7           | 7.13                     | 0.86         | <0.6                       | -            | <2                        | -            |
| S <sup>e</sup> | 10             | 271                                 | 20            | 257                      | 35           | 789                        | 100          | 870                       | 24           |
| Sb             | 14             | 0.214                               | 0.041         | 0.196                    | 0.060        | <0.7                       | -            | <0.5                      | -            |
| Se             | 13             | <b>0.069<sup>c</sup></b>            | <b>0.023</b>  | <b>0.115<sup>c</sup></b> | <b>0.035</b> | <4                         | -            | <4                        | -            |
| Si             | 19             | <b>120<sup>c</sup></b>              | <b>40</b>     | 680                      | 321          | 1539                       | 537          | <b>4999<sup>c</sup></b>   | <b>545</b>   |
| Sn             | 19             | <b>0.50<sup>c,d</sup></b>           | <b>0.11</b>   | 1.12                     | 0.35         | <b>1.50<sup>c</sup></b>    | <b>0.41</b>  | <b>1.49<sup>d</sup></b>   | <b>0.12</b>  |
| Sr             | 19             | 18.7                                | 6.8           | 19.3                     | 9.2          | 19.5                       | 4.3          | 24.6                      | 0.4          |
| Te             | 13             | 0.0016                              | 0.0014        | 0.0014                   | 0.0010       | <1                         | -            | <0.6                      | -            |
| Ti             | 19             | <b>7.3<sup>c,d</sup></b>            | <b>1.9</b>    | 17.6                     | 3.2          | <b>49<sup>c</sup></b>      | <b>16</b>    | <b>203<sup>d</sup></b>    | <b>15</b>    |
| Tl             | 13             | 0.027                               | 0.011         | 0.0326                   | 0.0073       | <4                         | -            | <3                        | -            |
| U              | 13             | 0.041                               | 0.018         | 0.048                    | 0.011        | <3                         | -            | <3                        | -            |
| V              | 19             | <b>0.69<sup>c,d</sup></b>           | <b>0.13</b>   | 1.12                     | 0.11         | <b>2.08<sup>c</sup></b>    | <b>0.62</b>  | <b>2.84<sup>d</sup></b>   | <b>0.43</b>  |
| W              | 13             | 0.046                               | 0.020         | 0.0263                   | 0.0051       | <1                         | -            | <1                        | -            |
| Zn             | 19             | 309                                 | 80            | <b>258<sup>c</sup></b>   | <b>94</b>    | 393                        | 121          | <b>487<sup>c</sup></b>    | <b>65</b>    |
| Zr             | 19             | <b>0.57<sup>c,d</sup></b>           | <b>0.13</b>   | 1.15                     | 0.25         | <b>1.95<sup>c</sup></b>    | <b>0.14</b>  | <b>3.47<sup>d</sup></b>   | <b>0.40</b>  |

<sup>a</sup>N, number of valid data. <sup>b</sup>M, mean; SD, standard deviation. Digests obtained by methods A or B were analyzed with ICP-MS, and digests obtained by methods B1 or B2 were analysed with ICP-OES. <sup>c,d</sup>Results marked in bold were considered statistically significant for p-values <0.05. Same superscript letters within rows are significantly different. <sup>e</sup>S was determined with ICP-OES.

**Table S6.** Element concentrations (mg kg<sup>-1</sup>) in working royal jelly samples applying four digestion methods prior to analysis by ICP-MS and ICP-OES.

| Element        | N <sup>a</sup> | Measured concentration <sup>b</sup> |               |                          |              |           |       |                         |           |
|----------------|----------------|-------------------------------------|---------------|--------------------------|--------------|-----------|-------|-------------------------|-----------|
|                |                | Method A                            |               | Method B                 |              | Method B1 |       | Method B2               |           |
|                |                | M                                   | SD            | M                        | SD           | M         | SD    | M                       | SD        |
| Al             | 12             | 0.337                               | 0.051         | 0.59                     | 0.21         | 0.62      | 0.30  | 0.86                    | 0.38      |
| As             | 7              | 0.0073                              | 0.0051        | <0.001                   |              | <2        | -     | <2                      | -         |
| B              | 9              | 0.607                               | 0.043         | 0.78                     | 0.17         | <13       | -     | <8                      | -         |
| Ba             | 9              | 0.45                                | 0.23          | <0.2                     |              | 0.749     | 0.082 | 1.16                    | 0.11      |
| Be             | 8              | 0.000065                            | 0.000033      | 0.000081                 | 0.000017     | <0.02     | -     | <0.02                   | -         |
| Bi             | 6              | 0.00016                             | 0.00030       | 0.00039                  | 0.00043      | <0.4      | -     | 0.28                    | 0.24      |
| Ca             | 14             | 309                                 | 25            | 293                      | 30           | 213       | 68    | 176                     | 12        |
| Cd             | 6              | 0.00066                             | 0.00045       | 0.00030                  | 0.00028      | <0.06     | -     | <0.02                   | -         |
| Ce             | 9              | 0.0023                              | 0.0014        | 0.00304                  | 0.00071      | <0.1      | -     | <0.4                    | -         |
| Co             | 7              | 0.0025                              | 0.0017        | 0.0025                   | 0.0016       | <0.09     | -     | <0.1                    | -         |
| Cr             | 12             | <b>0.0120<sup>c</sup></b>           | <b>0.0062</b> | <b>0.103<sup>c</sup></b> | <b>0.006</b> | <0.1      | -     | <0.1                    | -         |
| Cs             | 8              | 0.015                               | 0.012         | 0.0244                   | 0.0035       | -         | -     | -                       | -         |
| Cu             | 12             | 5.4                                 | 1.0           | 5.7                      | 1.4          | 5.92      | 0.40  | 6.39                    | 0.10      |
| Fe             | 12             | 9.1                                 | 2.2           | 10.9                     | 4.2          | 12.5      | 1.2   | 13.3                    | 0.2       |
| Ga             | 5              | 0.0105                              | 0.0044        | <0.00001                 |              | <1        | -     | <0.4                    | -         |
| K              | 14             | 3620                                | 600           | 3310                     | 580          | 2900      | 200   | 3110                    | 72        |
| La             | 8              | 0.00113                             | 0.00080       | 0.00142                  | 0.00049      | <0.07     | -     | <0.05                   | -         |
| Li             | 8              | 0.0042                              | 0.0021        | 0.00339                  | 0.00072      | <0.1      | -     | <0.1                    | -         |
| Mg             | 14             | 324                                 | 33            | 361                      | 23           | 323       | 25    | 338                     | 9         |
| Mn             | 14             | 0.80                                | 0.15          | 0.693                    | 0.061        | 0.862     | 0.072 | 0.913                   | 0.011     |
| Mo             | 8              | 0.0499                              | 0.0057        | 0.0614                   | 0.0098       | <0.09     | -     | <0.1                    | -         |
| Na             | 14             | <b>116<sup>c</sup></b>              | <b>23</b>     | 132                      | 31           | 173       | 13    | <b>183<sup>c</sup></b>  | <b>4</b>  |
| Nb             | 7              | 0.00015                             | 0.00015       | 0.00010                  | 0.00017      | 0.098     | 0.084 | <0.3                    | -         |
| Ni             | 5              | 0.016                               | 0.024         | 0.0297                   | 0.0045       | <0.4      | -     | <0.6                    | -         |
| P              | 14             | <b>2180<sup>c</sup></b>             | <b>200</b>    | 2240                     | 303          | 2800      | 240   | <b>3010<sup>c</sup></b> | <b>21</b> |
| Pb             | 6              | 0.0052                              | 0.0048        | 0.0099                   | 0.0030       | <0.2      | -     | <0.2                    | -         |
| Rb             | 8              | 17.5                                | 3.0           | 16.8                     | 3.3          | <0.6      | -     | <2                      | -         |
| S <sup>d</sup> | 10             | 474                                 | 40            | 462                      | 34           | 1400      | 160   | 2050                    | 57        |
| Sb             | 7              | 0.00093                             | 0.00056       | 0.00062                  | 0.00019      | <0.7      | -     | <0.5                    | -         |
| Se             | 8              | 0.0410                              | 0.0079        | 0.0363                   | 0.0038       | <4        | -     | <4                      | -         |
| Si             | 8              | <b>45.3<sup>c</sup></b>             | <b>3.5</b>    | <b>76.6<sup>c</sup></b>  | <b>7.8</b>   | <15       | -     | <15                     | -         |
| Sn             | 8              | 0.00221                             | 0.00039       | 0.00198                  | 0.00084      | <0.1      | -     | <0.1                    | -         |
| Sr             | 8              | 0.232                               | 0.047         | 0.265                    | 0.082        | <0.1      | -     | <0.3                    | -         |
| Te             | 5              | 0.00048                             | 0.00039       | 0.00058                  | 0.00059      | <1        | -     | <0.6                    | -         |
| Ti             | 11             | 0.077                               | 0.012         | 0.102                    | 0.015        | <0.05     | -     | 0.108                   | 0.025     |
| Tl             | 8              | 0.00209                             | 0.00056       | 0.00214                  | 0.00073      | <4        | -     | <3                      | -         |
| U              | 8              | 0.000199                            | 0.000052      | 0.000272                 | 0.000031     | <3        | -     | <3                      | -         |
| V              | 5              | 0.0039                              | 0.0026        | 0.0013                   | 0.0017       | <0.1      | -     | <0.1                    | -         |
| W              | 2              | 0.00044                             | 0.00053       | <0.0002                  |              | <1        | -     | <1                      | -         |
| Zn             | 14             | 25.4                                | 1.0           | 25.5                     | 1.9          | 27.6      | 3.3   | 28.9                    | 0.6       |
| Zr             | 8              | 0.0033                              | 0.0029        | 0.0032                   | 0.0011       | <0.3      | -     | <0.1                    | -         |

<sup>a</sup> N, number of valid data. <sup>b</sup> M, mean; SD, standard deviation. Digests obtained by methods A or B were analyzed with ICP-MS, and digests obtained by methods B1 or B2 were analysed with ICP-OES. <sup>c</sup> Results marked in bold were considered statistically significant for p-values <0.05. Same superscript letters within rows are significantly different. <sup>d</sup> S was determined with ICP-OES.

**Table S7.** Wavelengths ( $\lambda$  and  $\lambda^*$ , nm), linearity range (LLOQ–ULOQ; mg kg<sup>-1</sup>), and limits of determination (LODs; mg kg<sup>-1</sup>) for each element and sample digestion treatment (methods A, B, B1, and B2) by ICP-OES.

| Element | $\lambda$ | $\lambda^*$ | LOD <sub>A</sub> | LOD <sub>B</sub> | LOD <sub>B1</sub> | LOD <sub>B2</sub> | N | LLOQ–ULOQ    |
|---------|-----------|-------------|------------------|------------------|-------------------|-------------------|---|--------------|
| Al      | 237.312   | 396.152     | 1                | 1                | 0.6               | 0.7               | 4 | 2 – 50       |
| As      | 188.98    | 193.696     | 2                | 2                | 2                 | 2                 | 3 | 5 – 50       |
| B       | 208.889   | 249.772     | 5                | 2                | 13                | 8                 | 5 | 27.5 – 550   |
| Ba      | 233.527   | 455.403     | 0.1              | 0.1              | 0.2               | 0.3               | 3 | 5 – 50       |
| Be      | 234.861   | 313.042     | 0.01             | 0.01             | 0.02              | 0.02              | 5 | 1 – 50       |
| Bi      | 190.171   | 223.061     | 0.1              | 0.1              | 0.4               | 0.1               | 4 | 2 – 50       |
| C       | 193.027   | 247.856     | 194              | 465              | 300               | 500               | 4 | 1000 – 20000 |
| Ca      | 315.887   | 317.939     | 30               | 30               | 140               | 80                | 5 | 500 – 10000  |
| Cd      | 214.439   | 226.502     | 0.07             | 0.07             | 0.06              | 0.02              | 4 | 2 – 50       |
| Ce      | 407.347   | 418.659     | 0.3              | 0.6              | 0.1               | 0.4               | 5 | 3 – 50       |
| Co      | 228.615   | 238.892     | 0.1              | 0.1              | 0.09              | 0.1               | 4 | 5 – 50       |
| Cr      | 267.716   | 284.984     | 0.2              | 0.3              | 0.1               | 0.1               | 4 | 2 – 50       |
| Cs      | 459.311   | 697.327     | -                | -                | -                 | -                 | 4 | 2 – 50       |
| Cu      | 324.754   | 327.395     | 0.05             | 0.05             | 0.4               | 0.3               | 4 | 2 – 50       |
| Fe      | 238.204   | 259.94      | 0.1              | 0.5              | 0.3               | 0.2               | 3 | 20 – 100     |
| Ga      | 294.363   | 417.204     | 0.7              | 0.6              | 1                 | 0.4               | 4 | 2 – 50       |
| K       | 766.491   | 769.897     | 50               | 40               | 140               | 100               | 5 | 250 – 5000   |
| La      | 333.749   | 379.477     | 0.07             | 0.07             | 0.07              | 0.05              | 5 | 1 – 50       |
| Li      | 460.289   | 670.783     | 0.1              | 0.1              | 0.1               | 0.1               | 3 | 2 – 10       |
| Mg      | 279.078   | 280.270     | 2                | 1                | 3                 | 2                 | 5 | 250 – 5000   |
| Mn      | 257.61    | 260.568     | 0.02             | 0.02             | 0.05              | 0.06              | 4 | 2 – 50       |
| Mo      | 202.032   | 204.598     | 0.05             | 0.07             | 0.09              | 0.1               | 5 | 1 – 50       |
| Na      | 589.592   | 568.821     | 5                | 5                | 10                | 12                | 5 | 250 – 5000   |
| Nb      | 295.088   | -           | 0.1              | 0.4              | 0.1               | 0.3               | 4 | 2 – 50       |
| Ni      | 222.295   | 231.604     | 0.2              | 0.3              | 0.4               | 0.6               | 4 | 2 – 50       |
| P       | 185.878   | 213.618     | 20               | 20               | 20                | 20                | 5 | 100 – 5000   |
| Pb      | 182.143   | 220.353     | 0.1              | 0.2              | 0.2               | 0.2               | 4 | 2 – 50       |
| Rb      | 420.179   | 780.026     | 0.8              | 0.2              | 0.6               | 2.0               | 3 | 5 – 50       |
| S       | 180.669   | 181.972     | 20               | 20               | 50                | 20                | 6 | 200 – 10000  |
| Sb      | 206.834   | 217.582     | 0.4              | 0.1              | 0.7               | 0.5               | 4 | 2 – 50       |
| Se      | 196.026   | 206.279     | 6                | 6                | 4                 | 4                 | 3 | 10 – 50      |
| Si      | 251.611   | 288.158     | 10               | 10               | 15                | 15                | 4 | 250 – 5000   |
| Sn      | 189.927   | 242.95      | 0.1              | 0.1              | 0.1               | 0.1               | 4 | 2 – 50       |
| Sr      | 407.771   | 460.733     | 0.1              | 0.1              | 0.1               | 0.3               | 5 | 27.5 – 55    |
| Te      | 214.282   | 238.579     | 0.3              | 0.6              | 1                 | 0.6               | 4 | 2 – 50       |
| Ti      | 334.941   | 336.122     | 0.2              | 0.2              | 0.05              | 0.1               | 5 | 2 – 1010     |
| Tl      | 351.923   | 377.572     | 3                | 3                | 4                 | 3                 | 3 | 25 – 100     |
| U       | 263.553   | 385.464     | 1                | 1                | 3                 | 3                 | 3 | 5 – 50       |
| V       | 268.796   | 292.401     | 0.3              | 0.3              | 0.1               | 0.1               | 5 | 1 – 50       |
| W       | 209.475   | 239.708     | 3                | 1                | 1                 | 1                 | 3 | 5 – 50       |
| Zn      | 206.2     | 213.857     | 0.5              | 1                | 3                 | 3                 | 6 | 20 – 5000    |
| Zr      | 339.198   | -           | 0.3              | 0.3              | 0.3               | 0.1               | 4 | 2 – 50       |



**Table S8.** Element concentrations of the certified material (NIST 1515; n=6; mg kg<sup>-1</sup>) obtained by ICP-MS (methods A, B, and B1) and ICP-OES (method B2).

| Element               | NIST 1515 <sup>a</sup> | Measured concentration <sup>b</sup> |                      |                   |                      |                   |                      |               |                      |
|-----------------------|------------------------|-------------------------------------|----------------------|-------------------|----------------------|-------------------|----------------------|---------------|----------------------|
|                       |                        | Method A                            | Z-score <sup>c</sup> | Method B          | Z-score <sup>c</sup> | Method B1         | Z-score <sup>c</sup> | Method B2     | Z-score <sup>c</sup> |
| <b>Al</b>             | 284.5 ± 5.8            | 248 ± 31                            | -2.8                 | 257 ± 10          | -6.5                 | 274 ± 12          | -2.1                 | 254 ± 15      | -5.0                 |
| <b>As</b>             | –                      | 0.118 ± 0.026                       | –                    | 0.149 ± 0.051     | –                    | <2                | –                    | <2            | –                    |
| <b>B</b>              | 27.6 ± 2.8             | 17.7 ± 0.6                          | -31.1                | 17.0 ± 0.6        | -43                  | 30.0 ± 1.2        | 2.4                  | 24.5 ± 1.4    | -4.3                 |
| <b>Ba</b>             | 48.8 ± 2.3             | 44.1 ± 0.7                          | -13.7                | 42.5 ± 0.4        | -35.5                | 49.0 ± 5.2        | 0.1                  | 43.4 ± 2.6    | -4.2                 |
| <b>Be</b>             | –                      | 0.00872 ± 0.00020                   | –                    | 0.0104 ± 0.0002   | –                    | 0.0126 ± 0.0012   | –                    | <0.02         | –                    |
| <b>Bi</b>             | –                      | 0.00278 ± 0.00060                   | –                    | 0.00286 ± 0.00028 | –                    | 0.00359 ± 0.00013 | –                    | <0.1          | –                    |
| <b>Ca</b>             | 15250 ± 100            | 15300 ± 65                          | 0.2                  | 14800 ± 97        | -2.1                 | 16400 ± 3000      | 0.8                  | 12700 ± 670   | -7.5                 |
| <b>Cd</b>             | 0.0132 ± 0.0015        | 0.0126 ± 0.0017                     | -0.7                 | 0.0129 ± 0.0002   | -4.3                 | 0.0120 ± 0.0005   | -5.4                 | <0.02         | –                    |
| <b>Ce</b>             | 3                      | 2.46 ± 0.01                         | -132                 | 2.80 ± 0.01       | -50.0                | 2.81 ± 0.27       | -1.4                 | 2.74 ± 0.70   | -0.9                 |
| <b>Co</b>             | 0.09                   | 0.0978 ± 0.0014                     | 46.2                 | 0.101 ± 0.002     | 31.6                 | 0.107 ± 0.008     | 4.1                  | <0.1          | –                    |
| <b>Cr</b>             | 0.3                    | 0.080 ± 0.018                       | -24.6                | 0.305 ± 0.056     | 0.2                  | 0.327 ± 0.056     | 1.2                  | 0.327 ± 0.008 | 6.5                  |
| <b>Cs<sup>d</sup></b> | –                      | 0.00391 ± 0.00030                   | –                    | 0.00525 ± 0.00013 | –                    | 0.00600 ± 0.00041 | –                    | –             | –                    |
| <b>Cu</b>             | 5.69 ± 0.13            | 4.59 ± 0.13                         | -21.4                | 5.44 ± 0.16       | -3.8                 | 5.58 ± 0.26       | -1.0                 | 5.43 ± 0.25   | -2.1                 |
| <b>Fe</b>             | 82.7 ± 2.6             | 79.5 ± 9.3                          | -0.7                 | 88.1 ± 2.0        | 4.9                  | 89.2 ± 6.2        | 2.1                  | 65.9 ± 3.1    | -10.7                |
| <b>Ga</b>             | –                      | 0.0735 ± 0.0023                     | –                    | 0.115 ± 0.008     | –                    | 0.304 ± 0.021     | –                    | <0.4          | –                    |
| <b>K</b>              | 16080 ± 210            | 14000 ± 184                         | -22.5                | 15300 ± 393       | -4.2                 | 16000 ± 1200      | -0.2                 | 13600 ± 55    | -91.8                |
| <b>La</b>             | 20                     | 16.4 ± 0.3                          | -24.8                | 17.8 ± 0.3        | -15.0                | 18.1 ± 1.5        | -1.7                 | 18.0 ± 2.6    | -1.5                 |
| <b>Li</b>             | –                      | 0.0226 ± 0.0015                     | –                    | 0.0856 ± 0.0003   | –                    | 0.0886 ± 0.0050   | –                    | 0.100 ± 0.001 | –                    |
| <b>Mg</b>             | 2710 ± 120             | 2560 ± 12                           | -31                  | 2590 ± 22         | -10.7                | 2740 ± 150        | 0.4                  | 2490 ± 69     | -6.5                 |
| <b>Mn</b>             | 54.1 ± 1.1             | 59.3 ± 4.7                          | 2.2                  | 55.5 ± 2.5        | 1.1                  | 55.8 ± 3.3        | 1.1                  | 47.1 ± 2.1    | -6.7                 |
| <b>Mo</b>             | 0.095 ± 0.011          | 0.0793 ± 0.0029                     | -10.8                | 0.0820 ± 0.0046   | -5.6                 | 0.092 ± 0.013     | -0.6                 | <0.1          | –                    |
| <b>Na</b>             | 24.4 ± 2.1             | 27.9 ± 0.2                          | 38.3                 | 28.4 ± 1.1        | 7.7                  | 27.1 ± 3.4        | 1.6                  | 27.1 ± 0.9    | 6.0                  |
| <b>Nb</b>             | –                      | 0.00220 ± 0.00018                   | –                    | 0.0116 ± 0.0002   | –                    | 0.0285 ± 0.0016   | –                    | <0.3          | –                    |
| <b>Ni</b>             | 0.936 ± 0.094          | 0.982 ± 0.022                       | 4.2                  | 0.938 ± 0.012     | 0.4                  | 1.04 ± 0.12       | 2.2                  | 0.811 ± 0.031 | -8.0                 |
| <b>P</b>              | 1593 ± 68              | 1640 ± 11                           | -3.3                 | 1570 ± 25         | -0.7                 | 1580 ± 36         | -1.5                 | 1620 ± 84     | 0.5                  |
| <b>Pb</b>             | 0.470 ± 0.024          | 0.372 ± 0.024                       | -8.2                 | 0.475 ± 0.040     | 0.2                  | 0.444 ± 0.027     | -1.9                 | 0.59 ± 0.10   | 2.3                  |
| <b>Rb</b>             | 10.2 ± 1.6             | 9.37 ± 0.42                         | -4.4                 | 9.34 ± 0.46       | -4.2                 | 9.33 ± 0.43       | -4.5                 | 6.54 ± 0.39   | -18.8                |
| <b>Se<sup>e</sup></b> | 1800                   | 1862 ± 56                           | 2.9                  | 1870 ± 52         | 3.1                  | 1930 ± 51         | 6.2                  | 2000 ± 250    | 1.6                  |
| <b>Sb</b>             | 0.013                  | 0.0120 ± 0.0028                     | -0.9                 | 0.0128 ± 0.0011   | -0.4                 | 0.0119 ± 0.0029   | -0.9                 | <0.5          | –                    |
| <b>Se</b>             | –                      | 0.055 ± 0.010                       | –                    | 0.051 ± 0.023     | –                    | <4                | –                    | <4            | –                    |

|           |               |                   |       |                   |       |                   |      |               |       |
|-----------|---------------|-------------------|-------|-------------------|-------|-------------------|------|---------------|-------|
| <b>Si</b> | –             | 432 ± 22          | –     | 573 ± 22          | –     | 550 ± 30          | –    | 647 ± 65      | –     |
| <b>Sn</b> | –             | 0.0359 ± 0.0015   | –     | 0.0451 ± 0.0017   | –     | 0.0497 ± 0.0002   | –    | 0.27 ± 0.24   | –     |
| <b>Sr</b> | 25.1 ± 1.1    | 25.4 ± 1.2        | 0.6   | 23.7 ± 0.2        | -11.6 | 22.9 ± 3.5        | -1.2 | 21.2 ± 0.6    | -13.8 |
| <b>Te</b> | –             | 0.0033 ± 0.0010   | –     | 0.0034 ± 0.0034   | –     | 0.0094 ± 0.0020   | –    | <0.6          | –     |
| <b>Ti</b> | –             | 0.62 ± 0.13       | –     | 3.9 ± 1.4         | –     | 11.5 ± 1.6        | –    | 12.5 ± 0.8    | –     |
| <b>Tl</b> | –             | 0.00885 ± 0.00076 | –     | 0.00803 ± 0.00023 | –     | 0.0097 ± 0.0021   | –    | <3            | –     |
| <b>U</b>  | 0.006         | 0.00325 ± 0.00020 | -28.0 | 0.00415 ± 0.00016 | -22.6 | 0.00548 ± 0.00056 | -2.2 | <3            | –     |
| <b>V</b>  | 0.254 ± 0.027 | 0.239 ± 0.015     | -2.0  | 0.274 ± 0.032     | 1.3   | 0.250 ± 0.014     | -0.6 | 0.235 ± 0.039 | -1.0  |
| <b>W</b>  | 0.007         | 0.0085 ± 0.0037   | 0.8   | 0.00479 ± 0.00013 | -34.1 | 0.0074 ± 0.0013   | 0.8  | <1            | –     |
| <b>Zn</b> | 12.45 ± 0.43  | 11.2 ± 0.9        | -3.1  | 11.8 ± 0.4        | -3.8  | 12.4 ± 0.2        | -0.6 | 11.1 ± 0.7    | -4.9  |
| <b>Zr</b> | –             | 0.0323 ± 0.0004   | –     | 0.0586 ± 0.0021   | –     | 0.0689 ± 0.0033   | –    | 0.29 ± 0.21   | –     |

<sup>a</sup> Information mass fraction values for elements in SRM 1515. <sup>b</sup> ±Uncertainty =  $(k \times X_f \times CV_r) / 100 \times \sqrt{n}$ ;  $X_f$  = mean of observed values,  $CV_r$  = repeatability as coefficient of variation percent intra-run ( $n = 6$ ), and  $k = 2$  ( $p = 95\%$ ). <sup>c</sup> Z-score =  $(X_f - X_c) / (SD_r / \sqrt{n})$  where  $X_c$  is the certified value and  $SD_r$  the standard deviation for the repeatability precision. <sup>d</sup> Cs could not be analyzed because axial view ICP-OES is strongly affected by ionisation interference when elements with low ionisation potentials coexist in the sample. <sup>e</sup> S concentration is determined with ICP-OES.

**Table S9.** Trueness bias percentage (Tbias%) and repeatability (CVr%) of the certified material (NIST 1515; n=6; mg kg<sup>-1</sup>) obtained by ICP-MS (methods A, B, and B1) and ICP-OES (method B2).

| Element        | Method A |      | Method B |      | Method B1 |      | Method B2       |                 |
|----------------|----------|------|----------|------|-----------|------|-----------------|-----------------|
|                | Tbias%   | CVr% | Tbias%   | CVr% | Tbias%    | CVr% | Tbias%          | CVr%            |
| Al             | -12.8    | 12.7 | -9.7     | 4.0  | -3.7      | 4.5  | -10.7           | 5.8             |
| B              | -35.9    | 4.4  | -38.3    | 3.5  | 8.7       | 8.0  | -11.1           | 7.1             |
| Ba             | -9.6     | 1.9  | -12.9    | 1.0  | 0.4       | 13.0 | -11.1           | 7.3             |
| Ca             | 0.3      | 3.0  | -2.9     | 3.4  | 7.6       | 22.2 | -16.6           | 6.5             |
| Cd             | -4.6     | 16.2 | -2.6     | 1.6  | -8.9      | 4.4  | nd <sup>a</sup> | nd <sup>a</sup> |
| Ce             | -18.0    | 0.4  | -6.8     | 0.4  | -6.4      | 11.6 | -8.7            | 25.5            |
| Co             | 8.7      | 1.4  | 12.2     | 1.8  | 12.6      | 11.2 | nd <sup>a</sup> | nd <sup>a</sup> |
| Cr             | -73.4    | 27.6 | 1.6      | 22.6 | 9.0       | 17.0 | 9.1             | 3.2             |
| Cu             | -19.4    | 2.8  | -4.3     | 2.9  | -1.9      | 4.6  | -4.6            | 5.6             |
| Fe             | -3.9     | 14.3 | 6.5      | 3.0  | 7.9       | 8.5  | -20.3           | 5.8             |
| K              | -12.9    | 1.6  | -5.1     | 3.2  | -0.7      | 9.2  | -15.7           | 0.5             |
| La             | -17.8    | 2.1  | -10.9    | 2.0  | -9.7      | 15.5 | -9.9            | 17.6            |
| Mg             | -5.6     | 0.5  | -4.3     | 1.0  | 1.0       | 6.7  | -8.2            | 3.4             |
| Mn             | 9.6      | 9.8  | 2.7      | 5.5  | 3.2       | 7.2  | -12.9           | 5.4             |
| Mo             | -16.5    | 4.5  | -13.7    | 6.9  | -3.6      | 14.5 | nd <sup>a</sup> | nd <sup>a</sup> |
| Na             | 14.3     | 0.8  | 16.6     | 4.5  | 11.0      | 15.3 | 11.0            | 4.1             |
| Ni             | 4.9      | 2.7  | 0.2      | 1.5  | 11.3      | 11.2 | -13.4           | 4.7             |
| P              | 3.1      | 0.9  | -1.6     | 2.6  | -1.0      | 3.5  | 1.4             | 6.4             |
| Pb             | -20.9    | 7.9  | 1.1      | 10.4 | -5.5      | 7.4  | 24.8            | 20.8            |
| Rb             | -8.1     | 4.9  | -8.4     | 5.4  | -8.5      | 5.0  | -35.9           | 7.3             |
| S <sup>b</sup> | 3.4      | 2.8  | 3.9      | 3.0  | 7.2       | 2.6  | 11.4            | 15.3            |
| Sb             | -7.7     | 23.6 | -1.4     | 9.0  | -8.5      | 24.6 | nd <sup>a</sup> | nd <sup>a</sup> |
| Sr             | 1.3      | 5.6  | -5.5     | 1.2  | -8.6      | 18.6 | -15.7           | 3.3             |
| U              | -45.8    | 7.4  | -30.9    | 4.8  | -8.6      | 10.3 | nd <sup>a</sup> | nd <sup>a</sup> |
| V              | -5.9     | 7.6  | 7.8      | 14.1 | -1.6      | 7.1  | -7.5            | 20.4            |
| W              | 22.0     | 52.5 | -31.6    | 3.3  | 5.9       | 18.1 | nd <sup>a</sup> | nd <sup>a</sup> |
| Zn             | -10.0    | 8.8  | -5.2     | 3.6  | -0.7      | 3.2  | -10.5           | 5.9             |

<sup>a</sup> nd, not determined because the element concentration was lower than LOD. <sup>b</sup> S concentration is determined with ICP-OES.

**Table S10.** Concentrations (mg Kg<sup>-1</sup>) of each element in some commercially beehive products obtained by method B.

| Element | Honey 1   |           | Honey 2  |          | Honey 3  |          | Honey 4 |         | Honey 5  |          |
|---------|-----------|-----------|----------|----------|----------|----------|---------|---------|----------|----------|
|         | M         | SD        | M        | SD       | M        | SD       | M       | SD      | M        | SD       |
| Al      | 0.61      | 0.12      | 0.318    | 0.063    | 7.74     | 0.49     | 5.60    | 0.22    | 0.597    | 0.071    |
| As      | <LOD      | -         | <LOD     | -        | <LOD     | -        | <LOD    | -       | <LOD     | -        |
| B       | 6.23      | 0.30      | 0.671    | 0.027    | 3.28     | 0.12     | 3.63    | 0.28    | 7.22     | 0.35     |
| Ba      | <LOD      | -         | <LOD     | -        | 1.722    | 0.025    | 0.503   | 0.045   | <LOD     | -        |
| Be      | <LOD      | -         | <LOD     | -        | 0.00116  | 0.00023  | 0.00139 | 0.00023 | <LOD     | -        |
| Bi      | <LOD      | -         | <LOD     | -        | 0.000261 | 0.000053 | <LOD    | -       | <LOD     | -        |
| Ca      | 83.0      | 8.2       | 32.5     | 8.1      | 147      | 10       | 129     | 17      | 55       | 14       |
| Cd      | 0.000177  | 0.000028  | 0.00067  | 0.00023  | 0.00159  | 0.00047  | <LOD    | -       | <LOD     | -        |
| Ce      | 0.00104   | 0.00023   | <LOD     | -        | 0.0131   | 0.0010   | 0.0184  | 0.0004  | 0.000968 | 0.000059 |
| Co      | 0.00597   | 0.00057   | 0.00144  | 0.00037  | 0.0105   | 0.0005   | 0.0105  | 0.0010  | 0.00151  | 0.00036  |
| Cr      | 0.0129    | 0.0016    | 0.0377   | 0.0099   | 0.0204   | 0.0029   | 0.0153  | 0.0040  | <LOD     | -        |
| Cs      | 0.00412   | 0.00020   | 0.00049  | 0.00010  | 0.696    | 0.012    | 0.502   | 0.032   | 0.00250  | 0.00039  |
| Cu      | 0.301     | 0.038     | 0.076    | 0.017    | 0.764    | 0.034    | 1.02    | 0.10    | 0.150    | 0.020    |
| Fe      | 3.10      | 0.19      | 2.20     | 0.56     | 3.98     | 0.94     | 4.59    | 0.57    | 0.742    | 0.081    |
| Ga      | 0.00248   | 0.00038   | <LOD     | -        | 0.0378   | 0.0043   | 0.0124  | 0.0029  | <LOD     | -        |
| K       | 1330      | 20        | 96.7     | 6.0      | 4700     | 204      | 3791    | 223     | 750      | 28       |
| La      | 0.00050   | 0.00010   | 0.000172 | 0.000038 | 0.00800  | 0.00054  | 0.00991 | 0.00023 | 0.00070  | 0.00016  |
| Li      | 0.00938   | 0.00089   | 0.00918  | 0.00051  | 0.00334  | 0.00028  | 0.0107  | 0.0004  | 0.00442  | 0.00020  |
| Mg      | 47.5      | 3.1       | 21.1     | 0.9      | 91.1     | 3.1      | 107     | 3       | 18.9     | 0.9      |
| Mn      | 1.07      | 0.05      | 0.314    | 0.024    | 2.13     | 0.23     | 2.09    | 0.17    | 0.120    | 0.022    |
| Mo      | 0.00444   | 0.00093   | 0.00054  | 0.00018  | 0.0080   | 0.0011   | 0.0056  | 0.0010  | 0.00166  | 0.00032  |
| Na      | 51.5      | 1.7       | 109      | 6        | 32.7     | 2.8      | 51.7    | 0.9     | 16.8     | 2.1      |
| Nb      | 0.0000203 | 0.0000028 | <LOD     | -        | 0.00093  | 0.00025  | 0.00100 | 0.00029 | 0.000053 | 0.000010 |
| Ni      | 0.0357    | 0.0059    | 0.0217   | 0.0036   | 0.0391   | 0.0021   | 0.0586  | 0.0092  | 0.0090   | 0.0021   |
| P       | 54.9      | 7.8       | 10.6     | 0.8      | 65.5     | 2.4      | 136     | 9       | 32.4     | 1.7      |
| Pb      | 0.0286    | 0.0059    | 0.00199  | 0.00055  | 0.0296   | 0.0075   | 0.0347  | 0.0049  | 0.0234   | 0.0081   |
| Rb      | 1.76      | 0.11      | 0.0983   | 0.0076   | 59       | 12       | 49.2    | 8.9     | 1.54     | 0.18     |
| Sb      | <LOD      | -         | 0.00201  | 0.00071  | <LOD     | -        | <LOD    | -       | 0.00208  | 0.00083  |
| Se      | <LOD      | -         | <LOD     | -        | <LOD     | -        | <LOD    | -       | <LOD     | -        |
| Si      | 43.0      | 8.9       | 32.4     | 3.9      | 27.3     | 0.9      | 48.5    | 4.5     | 51.9     | 2.2      |
| Sn      | 0.0055    | 0.0019    | 0.00108  | 0.00016  | 0.0137   | 0.0019   | 0.00494 | 0.00043 | 0.0028   | 0.0008   |
| Sr      | 0.494     | 0.004     | 0.102    | 0.020    | 1.15     | 0.10     | 1.14    | 0.22    | 0.175    | 0.032    |
| Te      | <LOD      | -         | <LOD     | -        | 0.0056   | 0.0015   | 0.0053  | 0.0013  | 0.0023   | 0.0006   |
| Ti      | 0.0633    | 0.0028    | 0.0408   | 0.0072   | 0.160    | 0.012    | 0.183   | 0.025   | 0.056    | 0.012    |
| Tl      | 0.000176  | 0.000011  | 0.000205 | 0.000054 | 0.0378   | 0.0016   | 0.298   | 0.024   | 0.000387 | 0.000049 |
| U       | 0.000105  | 0.000013  | 0.000182 | 0.000043 | 0.00117  | 0.00020  | 0.00143 | 0.00010 | 0.000093 | 0.000032 |
| V       | <LOD      | -         | <LOD     | -        | 0.0170   | 0.0033   | 0.0207  | 0.0062  | 0.0071   | 0.0024   |
| W       | <LOD      | -         | <LOD     | -        | <LOD     | -        | <LOD    | -       | <LOD     | -        |
| Zn      | 1.62      | 0.07      | <LOD     | -        | 0.82     | 0.16     | 2.14    | 0.26    | <LOD     | -        |
| Zr      | 0.00128   | 0.00028   | <LOD     | -        | 0.0141   | 0.0011   | 0.0190  | 0.0040  | 0.00058  | 0.00014  |

**Table S11.** Concentrations (mg Kg<sup>-1</sup>) of each element in some commercially beehive products obtained by method B.

| Element | Honeydew 1 |          | Honeydew 2 |          | Beeswax  |          | Pollen   |          | Royal jelly |          |
|---------|------------|----------|------------|----------|----------|----------|----------|----------|-------------|----------|
|         | M          | SD       | M          | SD       | M        | SD       | M        | SD       | M           | SD       |
| Al      | 1.39       | 0.13     | 4.43       | 0.19     | 0.38     | 0.15     | 6.76     | 0.36     | 0.624       | 0.032    |
| As      | <LOD       | -        | <LOD       |          | 0.0385   | 0.0061   | 0.013    | 0.022    | <LOD        | -        |
| B       | 4.09       | 0.26     | 7.17       | 0.26     | <LOD     | -        | 4.96     | 0.45     | 1.45        | 0.16     |
| Ba      | 0.060      | 0.015    | 0.9        | 0.1      | <LOD     | -        | 1.29     | 0.10     | <LOD        | -        |
| Be      | <LOD       | -        | 0.00244    | 0.00023  | <LOD     | -        | 0.00051  | 0.00018  | <LOD        | -        |
| Bi      | 0.000400   | 0.000072 | 0.000301   | 0.000082 | <LOD     | -        | <LOD     | -        | <LOD        | -        |
| Ca      | 20.2       | 4.5      | 115        | 9        | 86       | 19       | 441      | 97       | 159         | 41       |
| Cd      | 0.00120    | 0.00024  | 0.00069    | 0.00018  | <LOD     | -        | 0.085    | 0.014    | <LOD        | -        |
| Ce      | 0.00279    | 0.00067  | 0.0404     | 0.0020   | 0.00100  | 0.00023  | 0.0086   | 0.0016   | 0.00054     | 0.00013  |
| Co      | 0.0167     | 0.0010   | 0.0261     | 0.0016   | <LOD     | -        | 0.177    | 0.020    | 0.00195     | 0.00030  |
| Cr      | 0.0282     | 0.0048   | 0.0682     | 0.0091   | 0.0308   | 0.0018   | 0.24     | 0.13     | 0.0370      | 0.0040   |
| Cs      | 0.00339    | 0.00016  | 0.521      | 0.026    | 0.00039  | 0.00020  | 0.0114   | 0.0022   | 0.00079     | 0.00017  |
| Cu      | 1.95       | 0.08     | 3.51       | 0.19     | <LOD     | -        | 6.16     | 0.36     | 4.75        | 0.16     |
| Fe      | 2.91       | 0.21     | 5.20       | 0.38     | 0.324    | 0.040    | 33       | 4        | 10.7        | 0.7      |
| Ga      | 0.00169    | 0.00043  | 0.0179     | 0.0010   | <LOD     | -        | 0.0328   | 0.0079   | <LOD        | -        |
| K       | 6540       | 270      | 2550       | 131      | <LOD     | -        | 4237     | 312      | 2750        | 120      |
| La      | 0.00142    | 0.00026  | 0.0165     | 0.0011   | <LOD     | -        | 0.0043   | 0.0011   | 0.000383    | 0.000077 |
| Li      | 0.00933    | 0.00037  | 0.00512    | 0.00037  | <LOD     | -        | 0.0169   | 0.0011   | 0.00378     | 0.00050  |
| Mg      | 105        | 5        | 126        | 6        | 2.8      | 2.2      | 381      | 25       | 262         | 9        |
| Mn      | 1.17       | 0.04     | 2.69       | 0.14     | 0.039    | 0.016    | 19       | 0        | 0.701       | 0.054    |
| Mo      | 0.0844     | 0.0044   | 0.00363    | 0.00082  | <LOD     | -        | 0.044    | 0.013    | 0.0502      | 0.0018   |
| Na      | 10.0       | 1.2      | 44.3       | 1.0      | 148      | 9        | 24.2     | 4.5      | 103         | 5        |
| Nb      | 0.000151   | 0.000036 | 0.00119    | 0.00008  | <LOD     | -        | <LOD     | -        | 0.000032    | 0.000029 |
| Ni      | 1.04       | 0.06     | 0.0342     | 0.0043   | <LOD     | -        | 1.71     | 0.01     | <LOD        |          |
| P       | 225        | 11       | 180        | 9        | <LOD     | -        | 1636     | 294      | 1020        | 26       |
| Pb      | 0.0208     | 0.0040   | 0.0211     | 0.0026   | 0.0124   | 0.0066   | 0.0203   | 0.0048   | 0.0067      | 0.0014   |
| Rb      | 3.54       | 0.12     | 23.1       | 2.3      | 0.0179   | 0.0032   | 3.8      | 1.8      | 2.17        | 0.07     |
| Sb      | 0.0080     | 0.0025   | 0.000894   | 0.000082 | 0.0046   | 0.0024   | <LOD     | -        | 0.00037     | 0.00029  |
| Se      | <LOD       |          | <LOD       | -        | <LOD     | -        | <LOD     | -        | 0.025       | 0.013    |
| Si      | 71.2       | 7.9      | 64.2       | 1.0      | 214      | 39       | 50.9     | 9.5      | 50.3        | 4.5      |
| Sn      | 0.0103     | 0.0018   | 0.00490    | 0.00041  | 0.0059   | 0.0011   | 0.00572  | 0.00020  | 0.338       | 0.022    |
| Sr      | 0.0713     | 0.0043   | 2.71       | 0.29     | <LOD     | -        | 0.840    | 0.036    | 0.0373      | 0.0051   |
| Te      | <LOD       |          | <LOD       |          | <LOD     | -        | 0.0025   | 0.0020   | 0.00101     | 0.00008  |
| Ti      | 0.0910     | 0.0009   | 0.262      | 0.043    | 0.040    | 0.018    | 0.93     | 0.25     | 0.205       | 0.014    |
| Tl      | 0.000325   | 0.000010 | 0.0114     | 0.0008   | <LOD     | -        | <LOD     | -        | 0.000809    | 0.000055 |
| U       | 0.000249   | 0.000021 | 0.00144    | 0.00012  | 0.000203 | 0.000055 | 0.000306 | 0.000072 | 0.000163    | 0.000034 |
| V       | <LOD       |          | 0.0363     | 0.0059   | 0.168    | 0.023    | 0.71     | 0.33     | 0.0059      | 0.0015   |
| W       | <LOD       |          | <LOD       |          | <LOD     | -        | <LOD     | -        | <LOD        | -        |
| Zn      | 0.41       | 0.11     | 2.56       | 0.13     | 2.40     | 0.22     | 24.1     | 3.3      | 22.5        | 0.7      |
| Zr      | 0.00059    | 0.00010  | 0.0293     | 0.0041   | 0.00118  | 0.00027  | 0.00592  | 0.00055  | 0.00017     | 0.00011  |

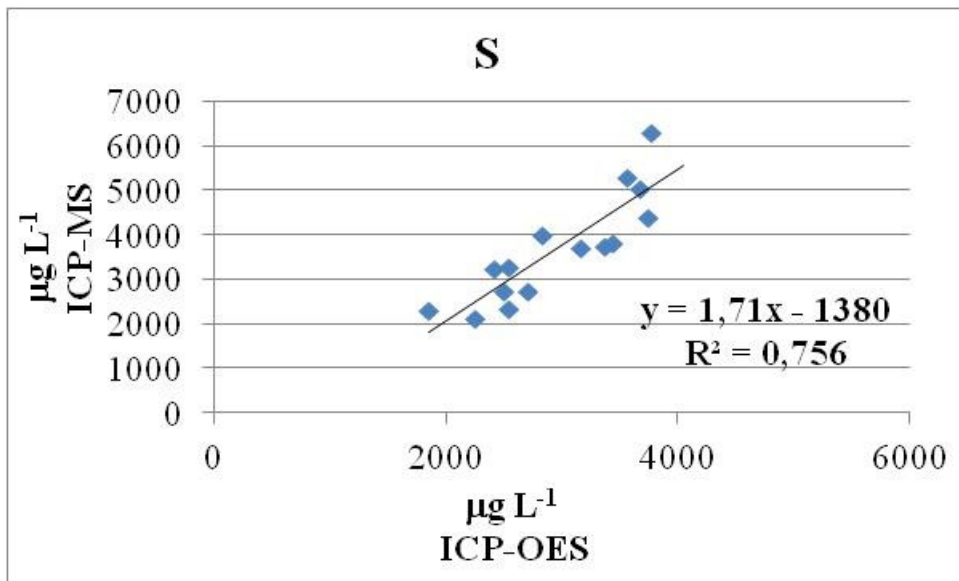

**Figure S1.** Correlation between the S data obtained in working samples by ICP-MS and ICP-OES.
